# Supplementary material for: Enhanced Electrochemical Water Oxidation Activity by Structural Engineered Prussian Blue Analogue/rGO Heterostructure
Source: MDPI journal article supplement (doi:10.3390/molecules27175472), 2022-08-25
Supplement: s1 [file s1]

## **Supporting Information**

### **Enhanced Electrochemical Water Oxidation Activity by Structural Engineered Prussian Blue Analogue/rGO Heterostructure**

Xiuyun An <sup>1</sup>, Weili Zhu <sup>1</sup>, Chunjuan Tang <sup>1</sup>, Lina Liu <sup>1</sup>, Tianwei Chen <sup>2</sup>,  
Xiaohu Wang <sup>2</sup>, Jianguo Zhao <sup>3,\*</sup> and Guanhua Zhang <sup>2,\*</sup>

<sup>1</sup> Department of Mathematics and Physics, Luoyang Institute of Science and Technology, Luoyang 471023, China

<sup>2</sup> State Key Laboratory of Advanced Design and Manufacturing for Vehicle Body, College of Mechanical and Vehicle Engineering, Hunan University, Changsha, 410082, China

<sup>3</sup> College of Physical & Electronic Information, Luoyang Normal University, Luoyang 471934, China

\* Corresponding authors: 2jg\_1981@163.com (J.Z.); guanhuaazhang@hnu.edu.cn (G. Z.)

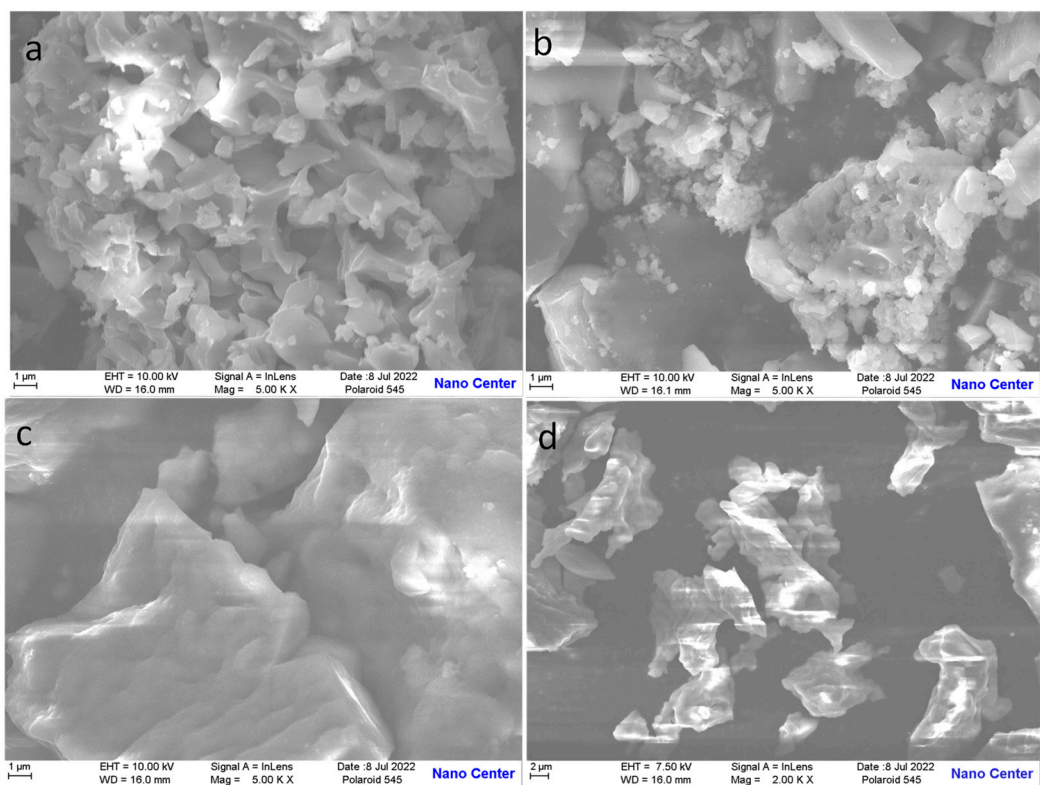

**Figure S1.** SEM images of as-obtained PBA materials. (a) PBA 0-1; (b) PBA 1-1; (c) PBA 3-1; (d) PBA 4-1.

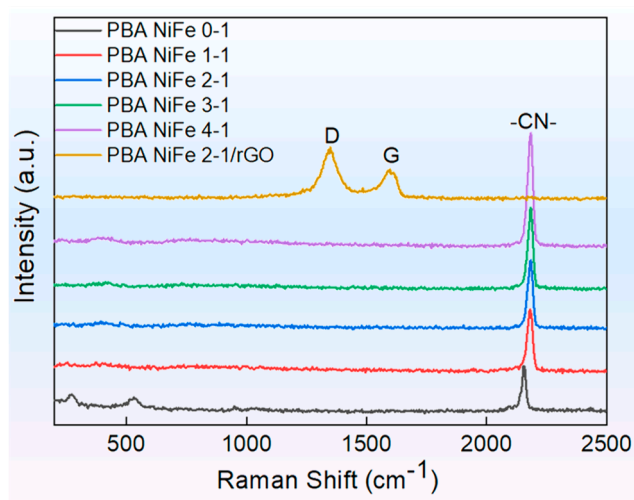

**Figure S2.** The Raman spectra of PBA materials.

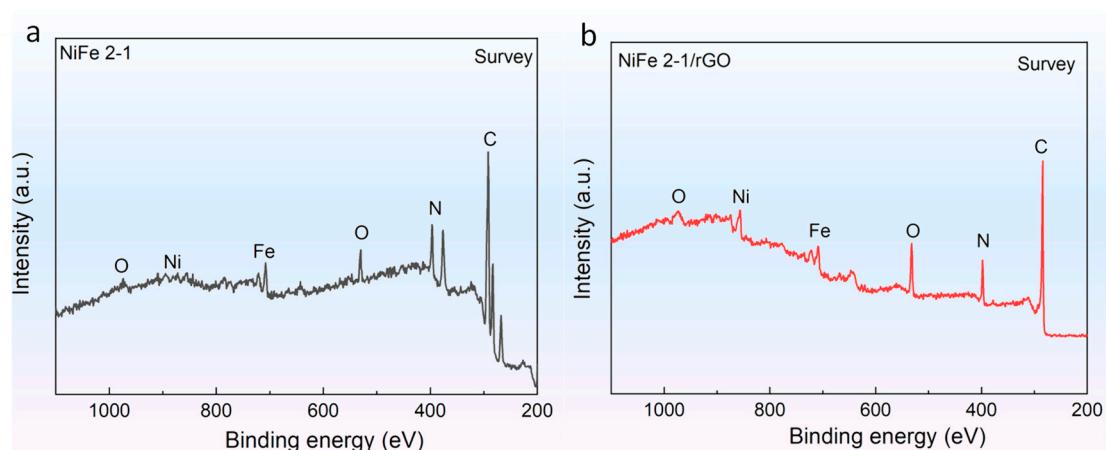

**Figure S3.** The XPS survey spectra of PBA materials before OER tests. **(a)** PBA NiFe 2-1; **(b)** PBA NiFe 2-1/rGO.

**Table S1.** Catalyst performance of analogous materials.

| Materials                                         | Methods                                  | Mass loading<br>/mg cm <sup>-2</sup> | Overpotential<br>/mV<br>(30 mAcm <sup>-2</sup> ) | Tafel slopes<br>/mV<br>dec <sup>-1</sup> | Durability<br>/h | Ref       |
|---------------------------------------------------|------------------------------------------|--------------------------------------|--------------------------------------------------|------------------------------------------|------------------|-----------|
| NiHCF-200c                                        | Sodium-ion electrochemical tuning method | 0.5                                  | 300                                              | 41                                       | 24               | [1]       |
| FeCoNi PBAs polyhedrons                           | Oil bath reaction                        | 0.5                                  | 300                                              | 52                                       | —                | [2]       |
| Ni-Fe-K <sub>0.23</sub> MnO <sub>2</sub> CNFs-300 | Sacrificial template strategy            | 2                                    | 290                                              | 42.3                                     | 24               | [3]       |
| NiCo@A-Ni Co-PBA-AA                               | Topological growth method                | 0.0006 (GCE)                         | 410                                              | 79.1                                     | 40               | [4]       |
| (v-NiFe PBA@rGO                                   | Rapid coprecipitation method             | 0.285                                | 290                                              | 36.2                                     | 200              | [5]       |
| PBA NiFe 2-1/rGO                                  | Coprecipitation method                   | 0.5                                  | 331.5                                            | 57.9                                     | 40               | This work |

GCE: glassy carbon electrode.

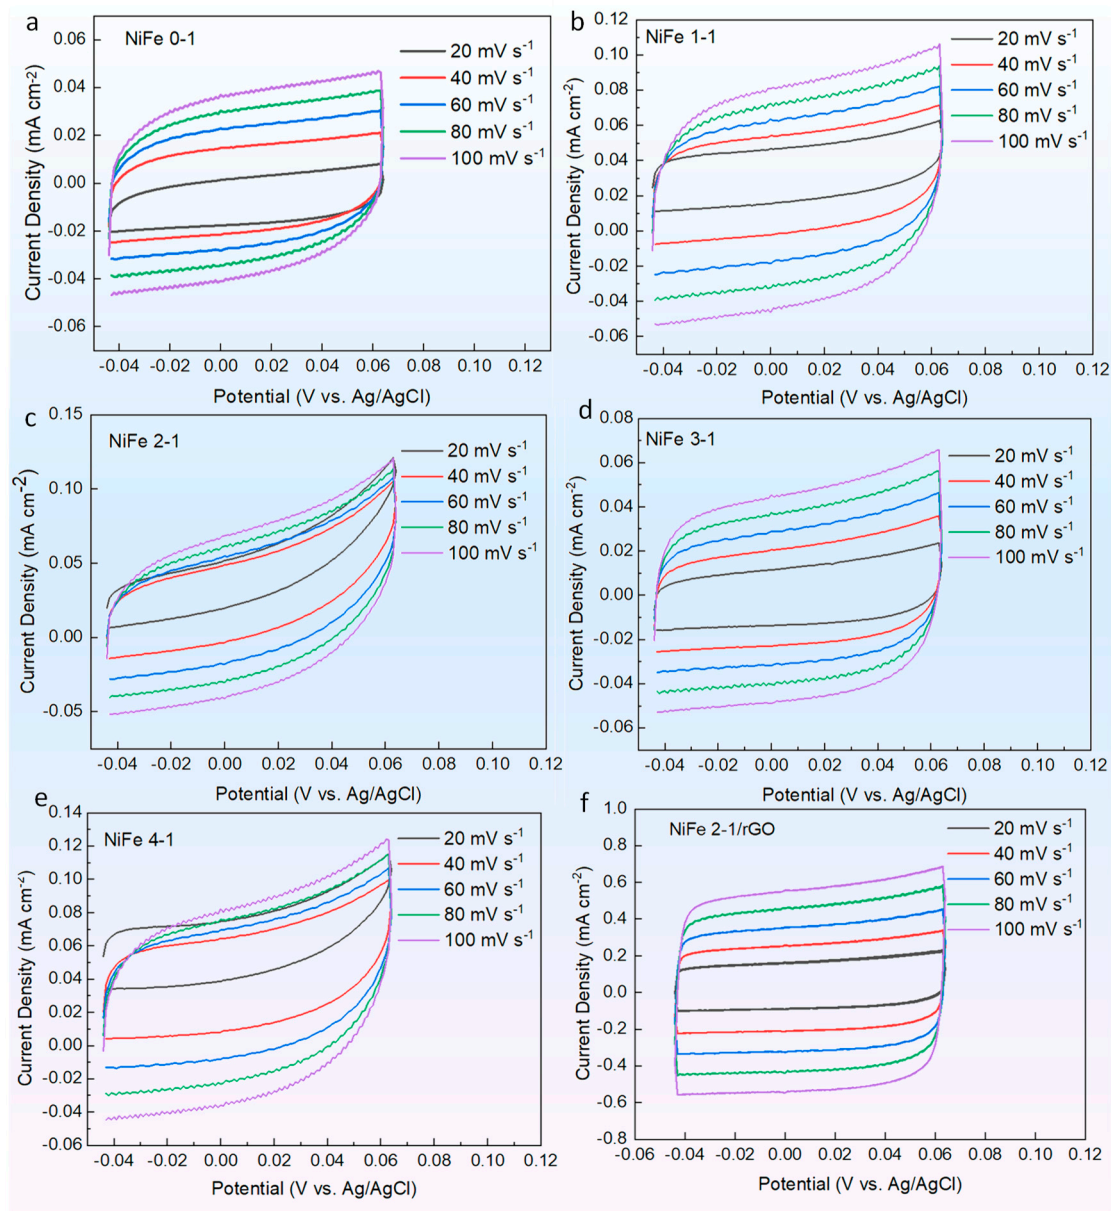

**Figure S4.** CV curves of as-obtained PBA materials at different scan rates in non-Faraday potential range. (a) PBA NiFe 0-1; (b) PBA NiFe 1-1; (c) PBA NiFe 2-1; (d) PBA NiFe 3-1; (e) PBA NiFe 4-1; (f) PBA NiFe 2-1/rGO.

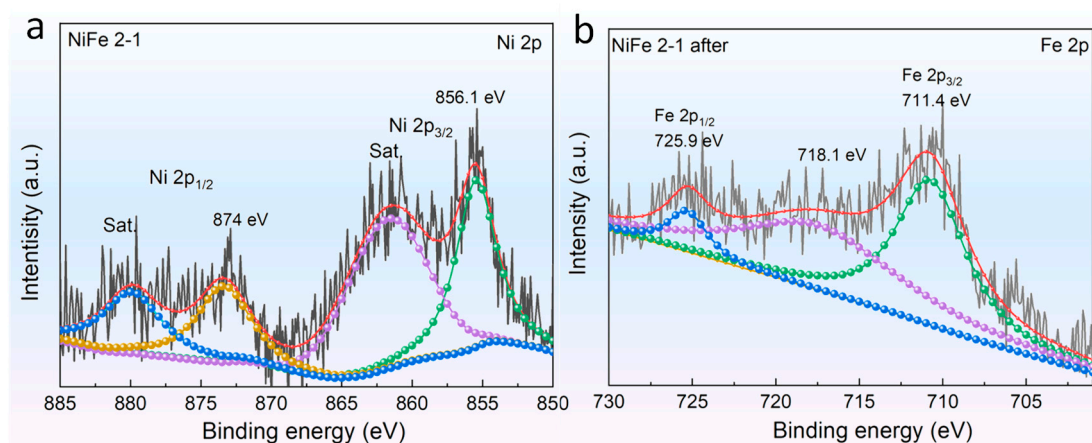

**Figure S5.** XPS spectra of PBA samples after OER measurement. High-resolution Ni 2p (**a**) and Fe 2p (**b**) spectra of PBA NiFe 2-1, respectively.

**Table S2.** The calculated Cdl ECSA values of as-obtained PBA materials.

| Materials        | C <sub>dl</sub> (mF cm <sup>-2</sup> ) | ECSA (cm <sup>2</sup> ) |
|------------------|----------------------------------------|-------------------------|
| PBA NiFe 0-1     | 0.4                                    | 10                      |
| PBA NiFe 1-1     | 0.6                                    | 15                      |
| PBA NiFe 2-1     | 0.5                                    | 12.5                    |
| PBA NiFe 3-1     | 0.4                                    | 10                      |
| PBA NiFe 4-1     | 0.5                                    | 12.5                    |
| PBA NiFe 2-1/rGO | 5.3                                    | 132.5                   |

## References

1. Tang, S.; Li, L.; Ren, H.; Lv, Q.; Lv, R., Sodium-ion electrochemical tuning of Prussian blue analog as an efficient oxygen evolution catalyst. *Mater. Today Chem.* **2019**, 12, 71-77.

2. Du, Y.; Ding, X.; Han, M.; Zhu, M., Morphology and Composition Regulation of FeCoNi Prussian Blue Analogues to Advance in the Catalytic Performances of the Derivative Ternary Transition-Metal Phosphides for OER. *ChemCatChem* **2020**, 12, 4339-4345.
3. Liao, H.; Guo, X.; Hou, Y.; Liang, H.; Zhou, Z.; Yang, H., Construction of Defect-Rich Ni-Fe-Doped K<sub>0.23</sub>MnO<sub>2</sub> Cubic Nanoflowers via Etching Prussian Blue Analogue for Efficient Overall Water Splitting. *Small* **2020**, 16, 1905223.
4. Zhang, H.; Li, P.; Chen, S.; Xie, F.; Riley, D. J., Anodic Transformation of a Core-Shell Prussian Blue Analogue to a Bifunctional Electrocatalyst for Water Splitting. *Adv. Funct. Mater.* **2021**, 31, 2106835.
5. Jo, S.; Kwon, J.; Choi, S.; Lu, T.; Byeun, Y.; Han, H.; Song, T., Engineering [Fe(CN)<sub>6</sub>]<sup>3-</sup> vacancy via free-chelating agents in Prussian blue analogues on reduced graphene oxide for efficient oxygen evolution reaction. *Appl. Surf. Sci.* **2022**, 574, 151620.
